# Supplementary material for: Biopolymer-protected graphene-Fe3O4 nanocomposite based wearable microneedle sensor: toward real-time continuous monitoring of dopamine
Source: RSC Adv. 2024 Feb 27;14(10):7131–41. doi: 10.1039/d4ra00110a (PMC10898425; doi:10.1039/d4ra00110a)
Supplement: RA-014-D4RA00110A-s001 [file RA-014-D4RA00110A-s001.pdf]

## SUPPORTING INFORMATION

### **Biopolymer-Protected Graphene-Fe<sub>3</sub>O<sub>4</sub> Nanocomposite Based Wearable Microneedle Sensor: Toward Real-Time Continuous Monitoring of Dopamine.**

Keerthanaa M. R.<sup>a</sup>, Lakshmi R. Panicker<sup>a</sup>, Roger Narayan<sup>b</sup>, Yugender Goud Kotagiri<sup>a\*</sup>

<sup>a</sup> Department of Chemistry, Indian Institute of Technology Palakkad, Palakkad, Kerala 678 557, India.

<sup>b</sup> Department of Biomedical Engineering, NC State University, Raleigh, NC 27695, USA.

#### *Corresponding Authors Details*

*Dr. Yugender Goud Kotagiri*

*Ramanujan Fellow,*

*Department of Chemistry,*

*Indian Institute of Technology Palakkad,*

*Palakkad, Kerala 678 557, India.*

*E-mail: [yugenderkotagiri@iitpkd.ac.in](mailto:yugenderkotagiri@iitpkd.ac.in)*

# SUPPORTING INFORMATION

## Contents

|                                                                                |   |
|--------------------------------------------------------------------------------|---|
| 1. Synthesis protocol of $\text{Fe}_3\text{O}_4$ -GO nanocomposite .....       | 2 |
| 2. Stress Analysis on Microneedle .....                                        | 3 |
| 3. Structural Characterization .....                                           | 3 |
| 3.1. FTIR Spectrum .....                                                       | 3 |
| 3.2. XRD Analysis.....                                                         | 4 |
| 4. Electrochemical Optimizations.....                                          | 4 |
| 5. Electrode-Electrolyte Interface studies-Scan Rate Effect .....              | 5 |
| 6. Electroanalytical Performance of Microneedle Sensor towards Dopamine: ..... | 7 |

## 1. Synthesis protocol of $\text{Fe}_3\text{O}_4$ -GO nanocomposite

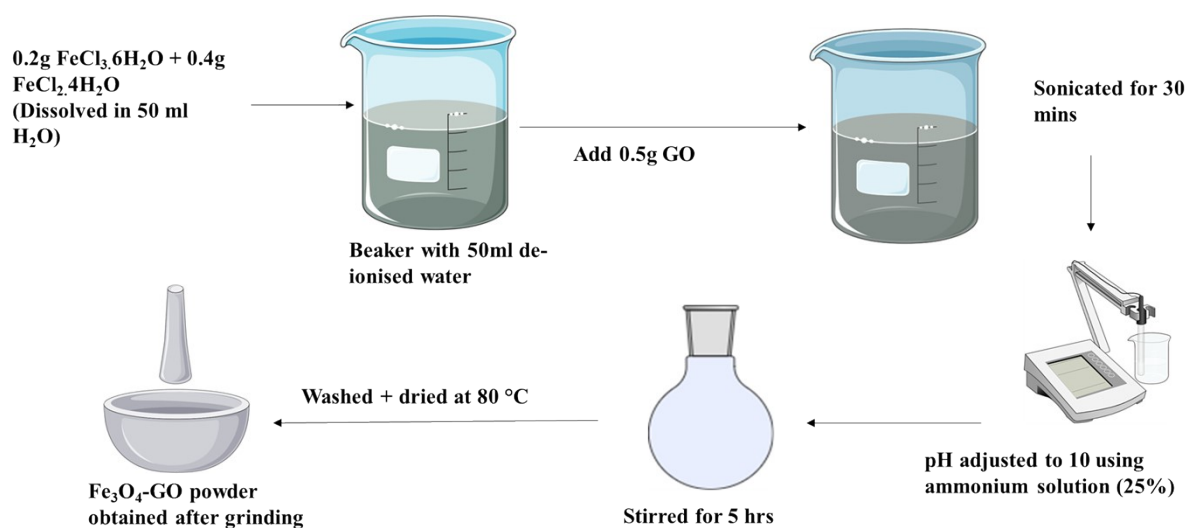

Figure S1: Schematic representation of synthesis protocol of  $\text{Fe}_3\text{O}_4$ -GO composite

## SUPPORTING INFORMATION

### 2. Stress Analysis on Microneedle

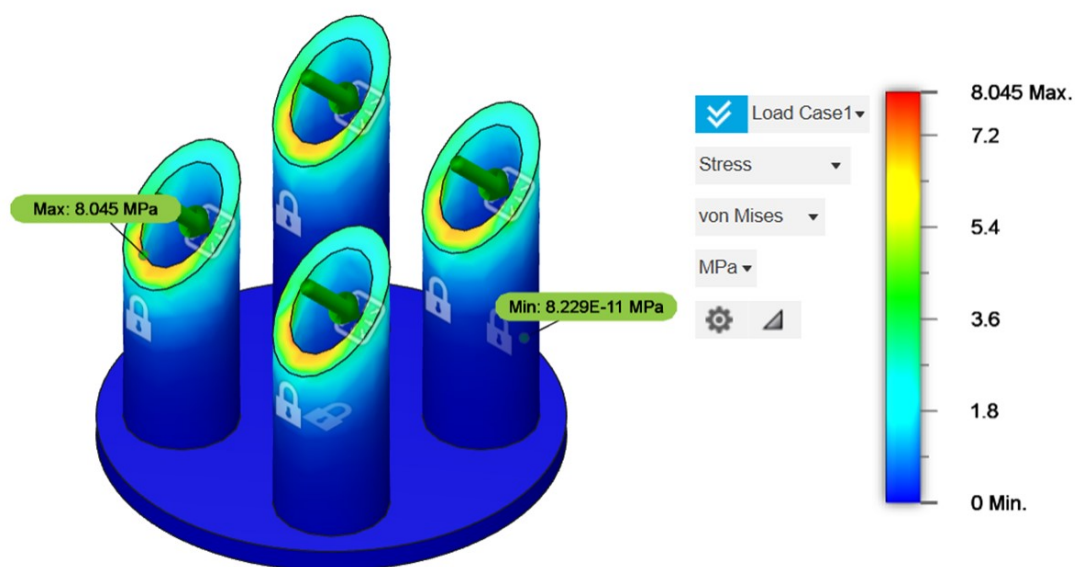

Figure S2: Microneedle insertion force analysis using the Fusion 360 simulation approach.

### 3. Structural Characterization

#### 3.1. FTIR Spectrum

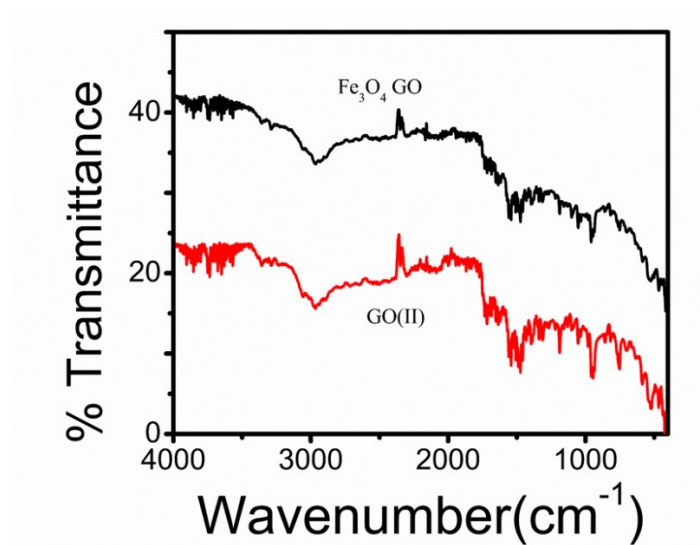

Figure S3: FTIR Spectrum of GO and Fe<sub>3</sub>O<sub>4</sub>-GO

## SUPPORTING INFORMATION

### 3.2. XRD Analysis

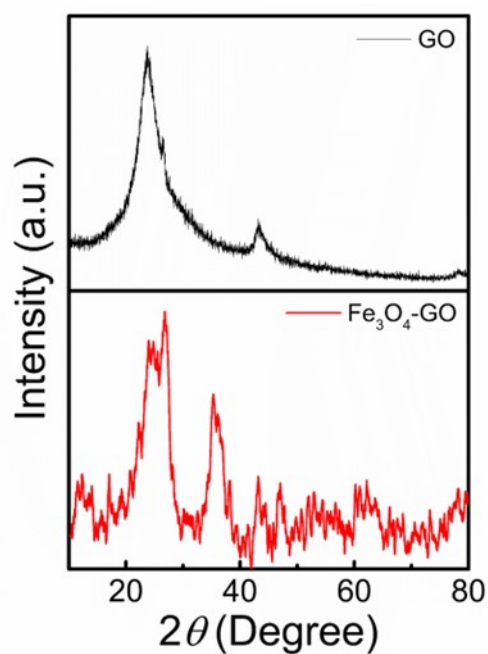

Figure S4: Powder XRD Spectrum of GO and Fe<sub>3</sub>O<sub>4</sub>-GO

### 4. Electrochemical Optimizations

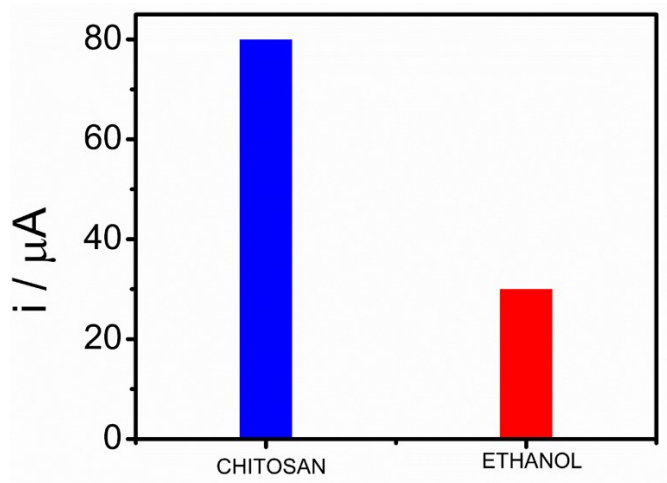

Figure S5: Optimization of Fe<sub>3</sub>O<sub>4</sub>-GO dissolved in chitosan and ethanol and corresponding current values obtained from cyclic voltammetry with potential applied from -0.2 V to 0.9 V at scan rate of 100 mVs<sup>-1</sup>.

## SUPPORTING INFORMATION

### 5. Electrode-Electrolyte Interface studies-Scan Rate Effect

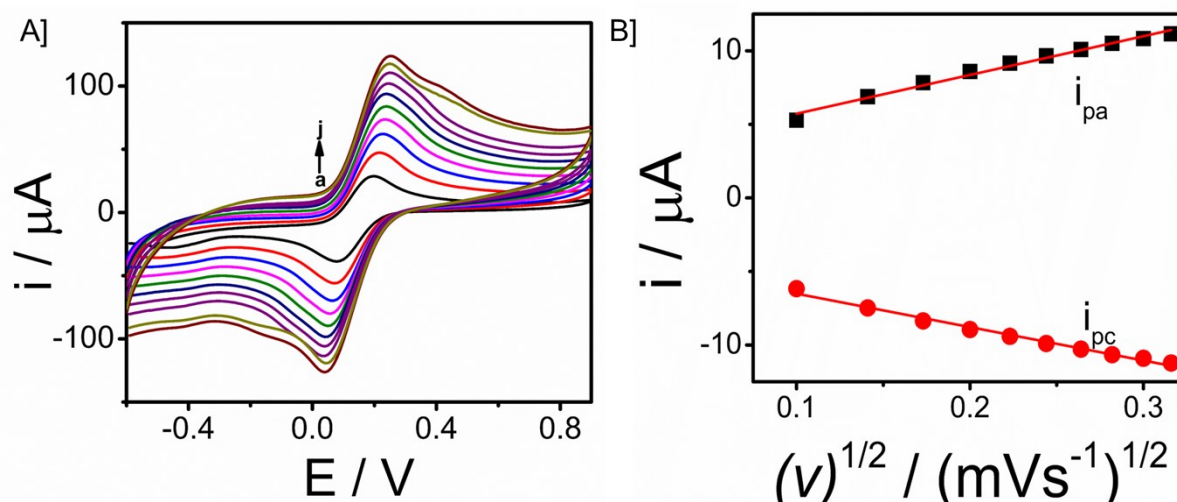

Figure S6: A] Effect of Scan Rate (10-100  $\text{mVs}^{-1}$ ) on Cyclic Voltammetry of CP/ $\text{Fe}_3\text{O}_4$ -GO/Chi in 10mM  $\text{K}_3[\text{Fe}(\text{CN})_6]$  + 0.1M KCl solution and.B] Plot of anodic ( $i_{pa}$ ) and cathodic peak ( $i_{pc}$ ) currents vs. scan rate.

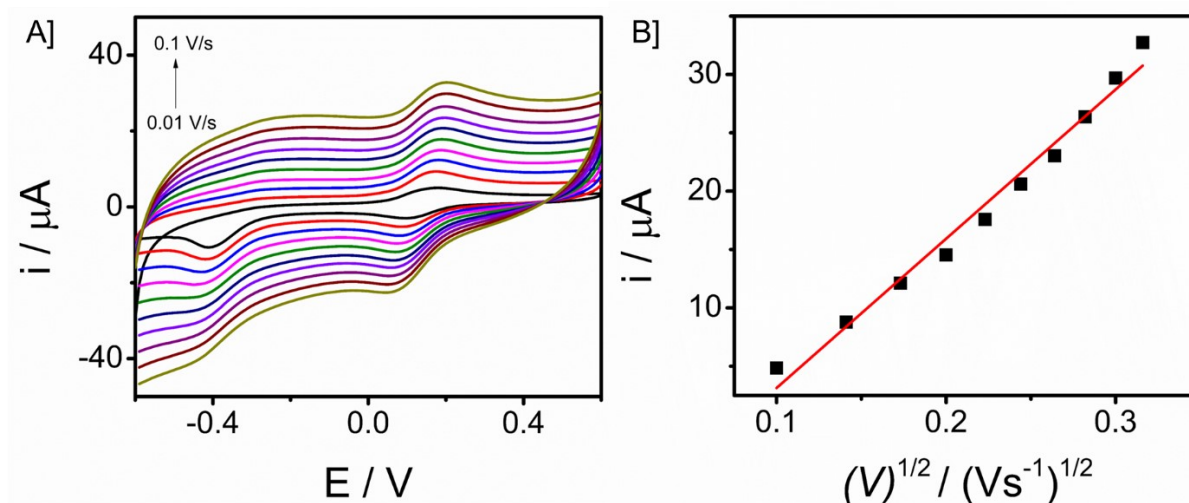

Figure S7: A] CV responses of Scan rate (0.01 V/s to 0.1V/s) Vs Applied potential in presence of 50  $\mu\text{M}$  DA, B] Calibration plot of square root of scan rate Vs peak current

## SUPPORTING INFORMATION

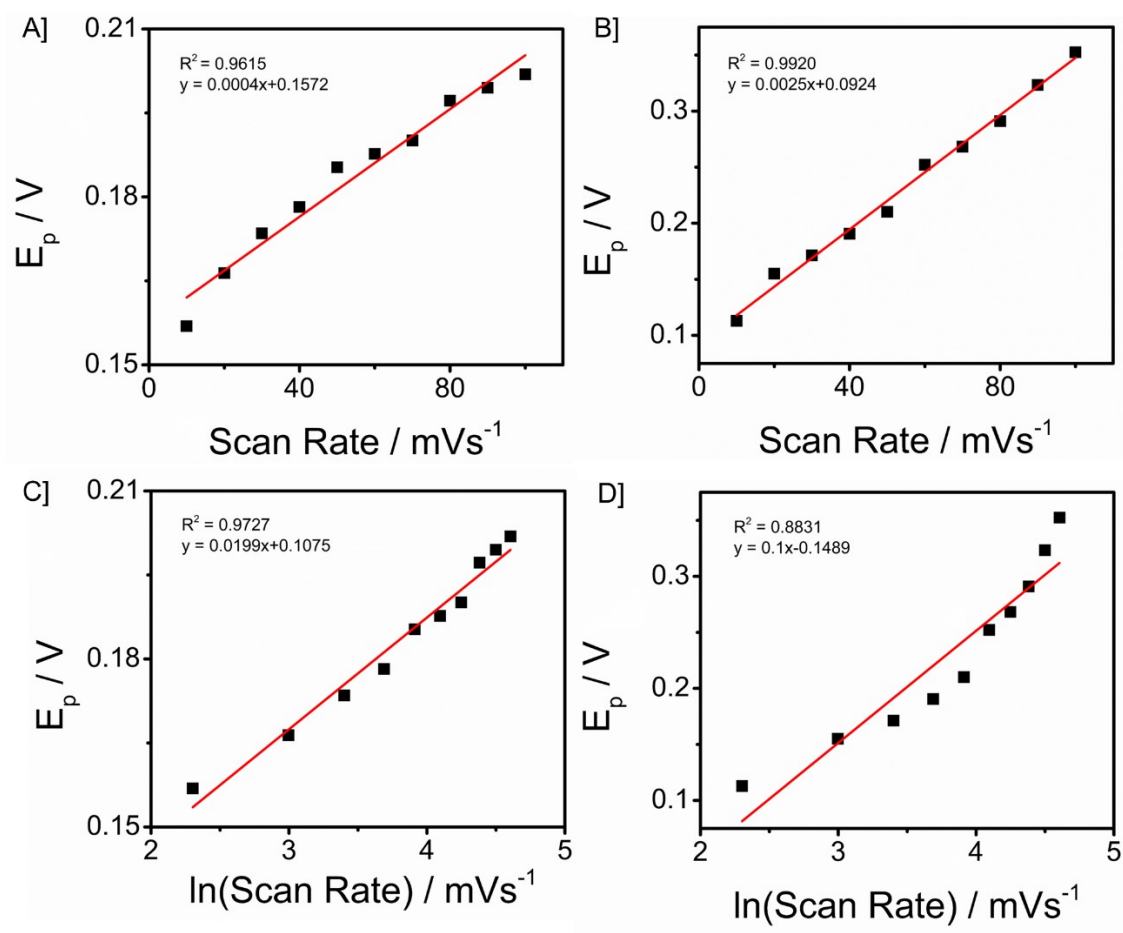

Figure S8: A] Plot of peak potential vs scan rate for 50  $\mu\text{M}$  DA in, C] Calibration plot of peak potential Vs  $\ln$  of scan rate of PBS CP/ $\text{Fe}_3\text{O}_4$ -GO/Chi electrode, B] Calibration plot of peak potential Vs scan rate and D] Peak potential Vs  $\ln(\text{Scan rate})$  in PBS containing 50  $\mu\text{M}$  of working electrode modified with GO.

$$\text{Leverson equation} - E_p = E^0 + \frac{RT}{\alpha n F} \ln \left[ \frac{RT k^0}{\alpha n F} \right] + \frac{RT}{\alpha n F} \ln(v)$$

## SUPPORTING INFORMATION

### 6. Electroanalytical Performance of Microneedle Sensor towards Dopamine:

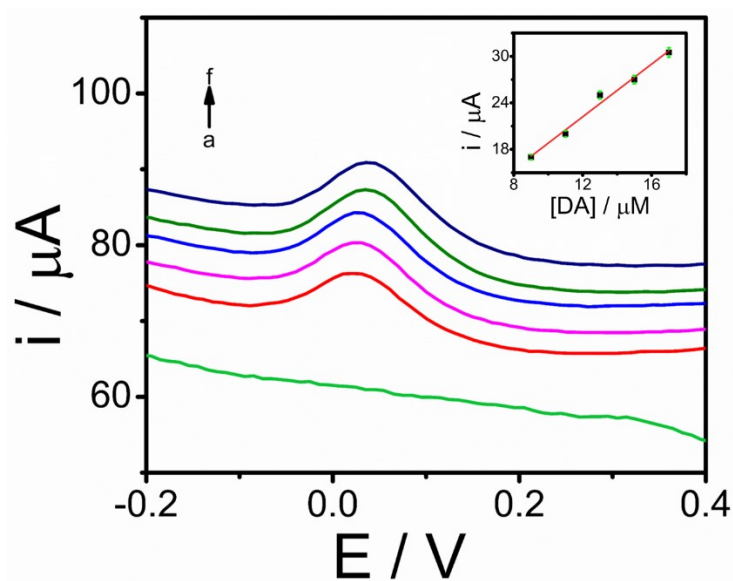

Figure S9: DPV responses of the microneedle sensor towards DA in the concentration range of 9  $\mu\text{M}$  to 17  $\mu\text{M}$  (in 0.1 M PBS) and linear plot between analyte concentration in  $\mu\text{M}$  (inset) and  $i/\mu\text{A}$  is provided in the inset.
